# Supplementary material for: Secreted protein acidic and rich in cysteine (SPARC) is upregulated by transforming growth factor (TGF)-β and is required for TGF-β-induced hydrogen peroxide production in fibroblasts
Source: PubMed Central journal article supplement (PMC3610252; doi:10.1186/1755-1536-6-6), 2013-03-21
Supplement: 1755-1536-6-6-S2.pdf [file 1755-1536-6-6-S2.pdf]

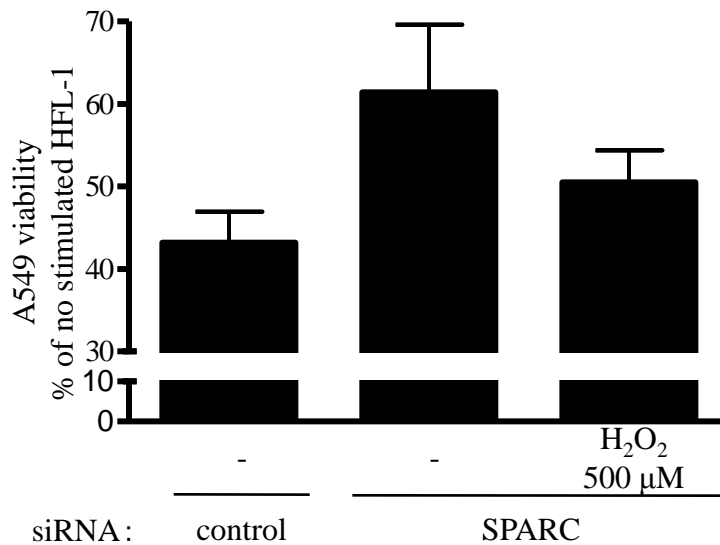

**Supplementary Figure 2 - Effect of exogenously applied H<sub>2</sub>O<sub>2</sub> on prevention of the loss of A549 cell viability by SPARC knockdown:**

HFL-1 cells transfected with non-targeting control or SPARC siRNA were pretreated with or without TGF- $\beta$  (2 ng/ml) for 16 h, and then washed before introduction of A549 cells. A549 cell viability was assessed following 48 h of coculture with/without H<sub>2</sub>O<sub>2</sub> by Cell Counting kit-8. Data are expressed as means  $\pm$  SE of three independent experiments.
