# Supplementary material for: Secreted protein acidic and rich in cysteine (SPARC) is upregulated by transforming growth factor (TGF)-β and is required for TGF-β-induced hydrogen peroxide production in fibroblasts
Source: PubMed Central journal article supplement (PMC3610252; doi:10.1186/1755-1536-6-6), 2013-03-21
Supplement: 1755-1536-6-6-S3.pdf [file 1755-1536-6-6-S3.pdf]

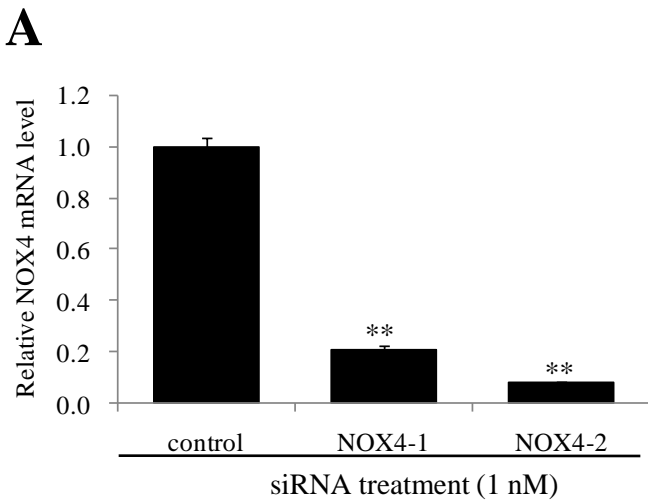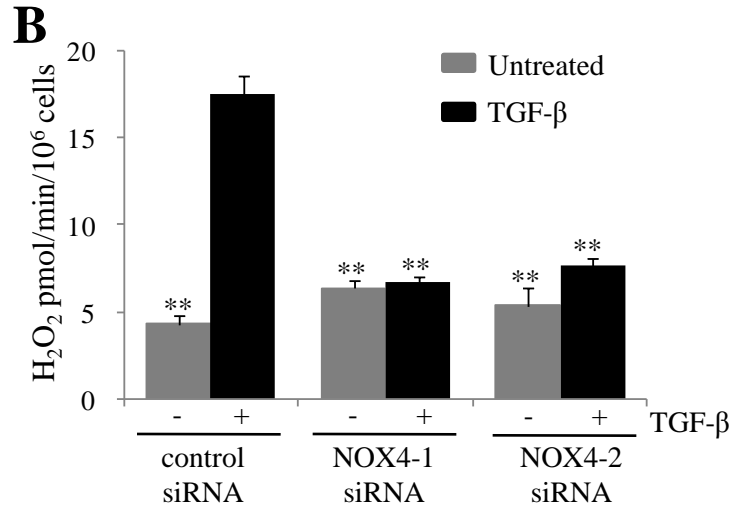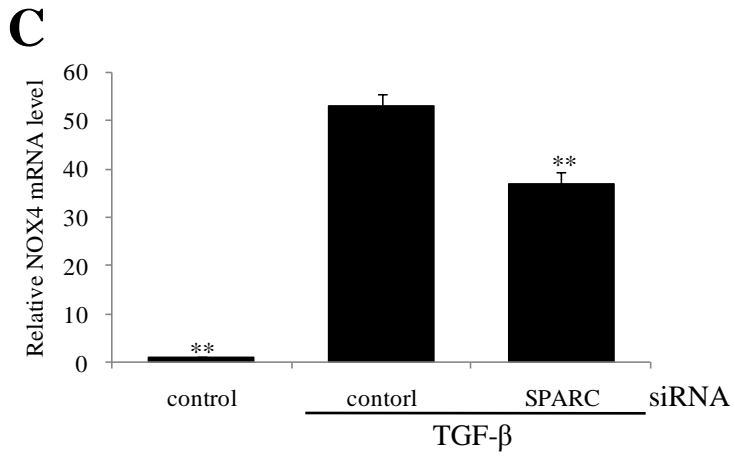

**Supplementary Figure 3 - NOX4 knockdown attenuates H<sub>2</sub>O<sub>2</sub> release from HFL-1 cells following TGF-β stimulation:**

(A) HFL-1 cells were transfected with non-targeting control or NOX4 siRNA for 24 h, starved of serum for 24 h, and then NOX4 gene expression was analyzed by real-time PCR analysis, and normalized relative to 18 rRNA. Data are expressed as means ± SE of three independent experiments. \*\**P* < 0.01 versus non-targeting control. (B) HFL-1 cells transfected with non-targeting control or NOX4 siRNA were treated with or without TGF-β (2 ng/ml) for 16 h before H<sub>2</sub>O<sub>2</sub> measurements. Data are expressed as means ± SE of three independent experiments. \*\**P* < 0.01 versus TGF-β stimulated HFL-1 transfected with non-targeting control siRNA. (C) HFL-1 cells were transfected with non-targeting control or SPARC siRNA for 24 h, starved of serum for 24 h, and then stimulated with TGF-β (2 ng/ml) for 24 h. NOX4 gene expression was analyzed by real-time PCR, and normalized relative to 18S rRNA. Data are expressed as means ± SE of three independent experiments. \*\**P* < 0.01 versus TGF-β stimulated HFL-1 transfected with non-targeting control siRNA.
